# Supplementary material for: How Attractive Is the Girl Next Door? An Assessment of Spatial Mate Acquisition and Paternity in the Solitary Cape Dune Mole-Rat, Bathyergus suillus
Source: PLoS One. 2012 Jun 29;7(6):e39866. doi: 10.1371/journal.pone.0039866 (PMC3387204; doi:10.1371/journal.pone.0039866)
Supplement: Appendix S1 — Summary information for each locus including number of alleles (A), frequency of null alleles (Null), expected and observed heterozygosity (HO, HE), and FIS (Probability of significant deviation from Hardy-Weinberg equilibrium; P<0.05 = *, P<0.01 = **, P<0.001 = ***). (DOCX) [file pone.0039866.s001.docx]

| | | **Locus** | **A** | **Null** | **HE** | **HO** | **FIS** | | --- | --- | --- | --- | --- | --- | | Bsuil06 | 19 | 0.09 | 0.9 | 0.83 | 0.08 | | | D5 | 13 | 0.17 | 0.88 | 0.56 | 0.36*** | | Cmech04 | 13 | 0.04 | 0.87 | 0.82 | 0.05 | | Bsuil04 | 14 | 0.02 | 0.84 | 0.83 | 0.02 | | Gcap07 | 10 | 0.02 | 0.84 | 0.83 | 0.02 | | Ch1 | 11 | 0.06 | 0.8 | 0.78 | 0.02 | | Gcap10 | 12 | 0.04 | 0.78 | 0.75 | 0.04 | | Chott03 | 7 | 0 | 0.73 | 0.76 | -0.04 | | Ch3 | 5 | 0.01 | 0.73 | 0.76 | -0.04 | | BS07 | 8 | 0.05 | 0.72 | 0.68 | 0.06*** | | Chott05 | 7 | 0.03 | 0.64 | 0.64 | -0.01 | | D7 | 8 | 0.02 | 0.63 | 0.59 | 0.07 | | Gcap02 | 7 | 0 | 0.62 | 0.63 | -0.03 | | Cmech09 | 6 | 0.07 | 0.62 | 0.54 | 0.14* | | D1 | 5 | 0.32 | 0.6 | 0.12 | 0.80*** | | BS01 | 5 | 0.01 | 0.59 | 0.62 | -0.05 | | Bsuil02 | 5 | 0 | 0.51 | 0.53 | -0.05 | | Cmech03 | 10 | 0.06 | 0.44 | 0.43 | 0.01 | | Bsuil01 | 7 | 0.01 | 0.33 | 0.32 | 0.01 | |  |  |  |  |  | | --- | --- | --- | --- | --- | --- | --- | --- | --- | --- | --- | --- | --- | --- | --- | --- | --- | --- | --- | --- | --- | --- | --- | --- | --- | --- | --- | --- | --- | --- | --- | --- | --- | --- | --- | --- | --- | --- | --- | --- | --- | --- | --- | --- | --- | --- | --- | --- | --- | --- | --- | --- | --- | --- | --- | --- | --- | --- | --- | --- | --- | --- | --- | --- | --- | --- | --- | --- | --- | --- | --- | --- | --- | --- | --- | --- | --- | --- | --- | --- | --- | --- | --- | --- | --- | --- | --- | --- | --- | --- | --- | --- | --- | --- | --- | --- | --- | --- | --- | --- | --- | --- | --- | --- | --- | --- | --- | --- | --- | --- | --- | --- | --- | --- | --- | --- | --- | --- | --- | --- | --- | --- | --- | --- | --- | --- | --- | |  |  |  |  |  |  | |  |  |  |  |  |  | |  |  |  |  |  |  | |  |  |  |  |  |  | |  |  |  |  |  |  | |  |  |  |  |  |  | |  |  |  |  |  |  | |  |  |  |  |  |  | |  |  |  |  |  |  | |  |  |  |  |  |  | |  |  |  |  |  |  | |  |  |  |  |  |  | |  |  |  |  |  |  | |  |  |  |  |  |  | |  |  |  |  |  |  | |  |  |  |  |  |  | |  |  |  |  |  |  | |  |  |  |  |  |  | |  |  |  |
| --- | --- | --- | --- | --- | --- | --- | --- | --- | --- | --- | --- | --- | --- | --- | --- | --- | --- | --- | --- | --- | --- | --- | --- | --- | --- | --- | --- | --- | --- | --- | --- | --- | --- | --- | --- | --- | --- | --- | --- | --- | --- | --- | --- | --- | --- | --- | --- | --- | --- | --- | --- | --- | --- | --- | --- | --- | --- | --- | --- | --- | --- | --- | --- | --- | --- | --- | --- | --- | --- | --- | --- | --- | --- | --- | --- | --- | --- | --- | --- | --- | --- | --- | --- | --- | --- | --- | --- | --- | --- | --- | --- | --- | --- | --- | --- | --- | --- | --- | --- | --- | --- | --- | --- | --- | --- | --- | --- | --- | --- | --- | --- | --- | --- | --- | --- | --- | --- | --- | --- | --- | --- | --- | --- | --- | --- | --- | --- | --- | --- | --- | --- | --- | --- | --- | --- | --- | --- | --- | --- | --- | --- | --- | --- | --- | --- | --- | --- | --- | --- | --- | --- | --- | --- | --- | --- | --- | --- | --- | --- | --- | --- | --- | --- | --- | --- | --- | --- | --- | --- | --- | --- | --- | --- | --- | --- | --- | --- | --- | --- | --- | --- | --- | --- | --- | --- | --- | --- | --- | --- | --- | --- | --- | --- | --- | --- | --- | --- | --- | --- | --- | --- | --- | --- | --- | --- | --- | --- | --- | --- | --- | --- | --- | --- | --- | --- | --- | --- | --- | --- | --- | --- | --- | --- | --- | --- | --- | --- | --- | --- | --- | --- | --- | --- | --- | --- | --- | --- | --- |
